# Supplementary material
Source: PubMed Central journal article supplement (PMC9903900)
Supplement: mmc1.pdf [file mmc1.pdf]

**SUPPLEMENT – EFFECTIVENESS OF POLICIES FOR CONTROLLING THE U.S. OPIOID EPIDEMIC: A  
MODEL-BASED ANALYSIS**

I.J. RAO, K. HUMPHREYS, M.L. BRANDEAU.

Figure S1. Projections for each base case model in the absence of additional intervention

Table S1. Parameter values and sources

Table S2. Results of base-case analyses with no additional intervention

Table S3. Results of interventions: difference from status quo (mean, minimum, and maximum)

Table S4. Results of sensitivity analyses: percentage reduction in opioid-related deaths, compared to no intervention

**Figure S1A. Projections for base case model 1 in the absence of additional intervention**

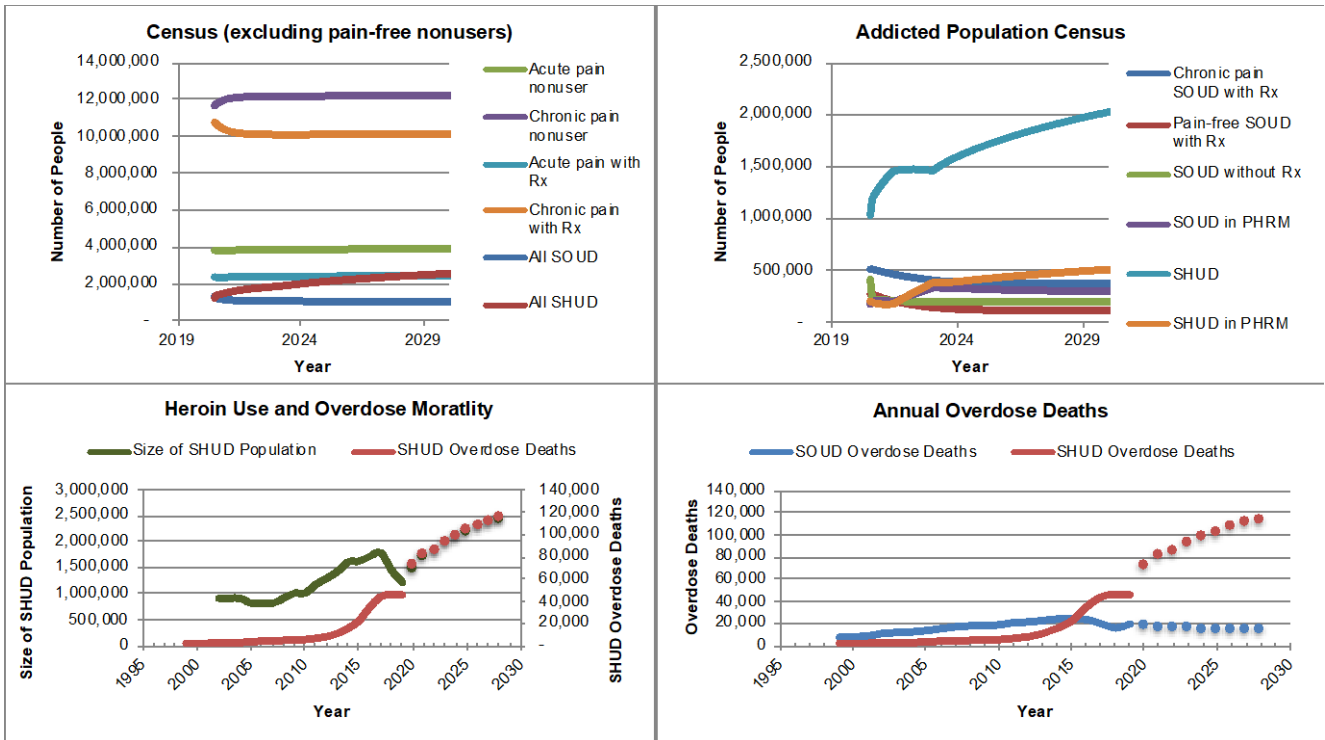

**Figure S1B. Projections for base case model 2 in the absence of additional intervention**

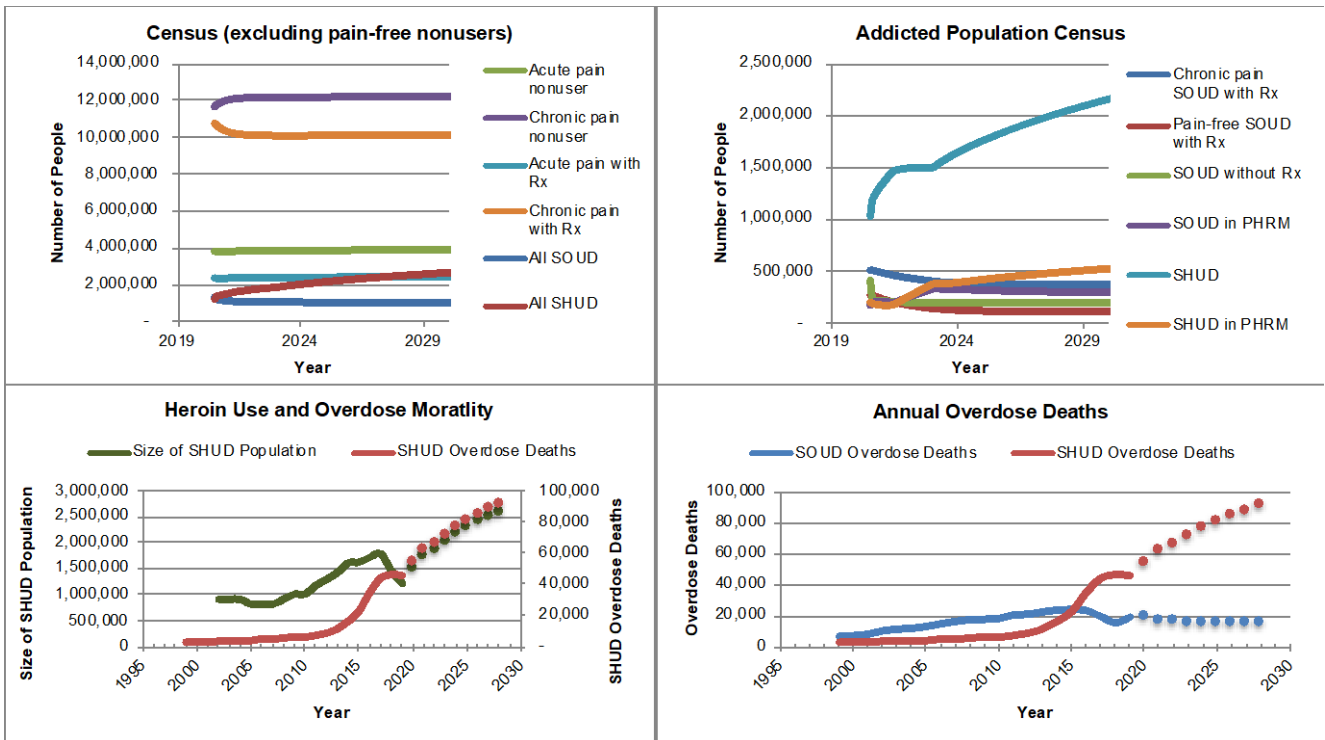

**Figure S1C. Projections for base case model 3 in the absence of additional intervention**

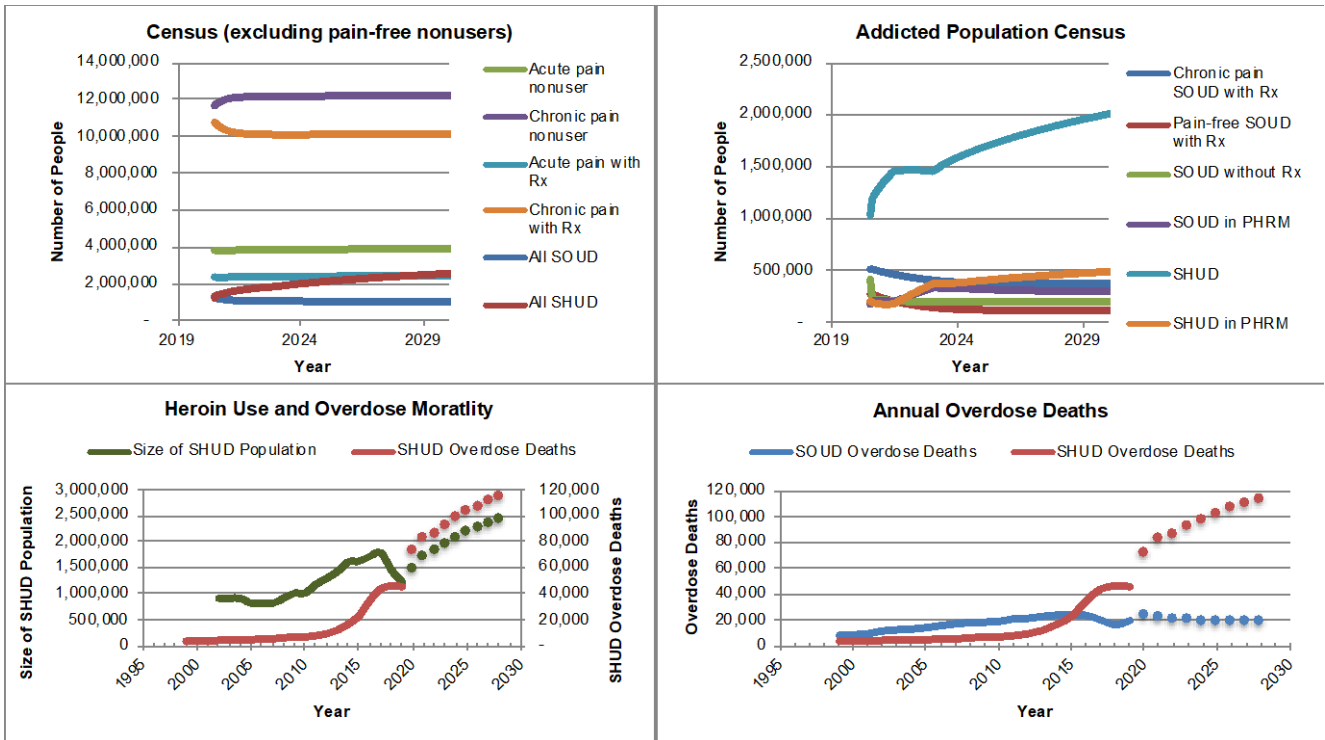

**Figure S1D. Projections for base case model 4 in the absence of additional intervention**

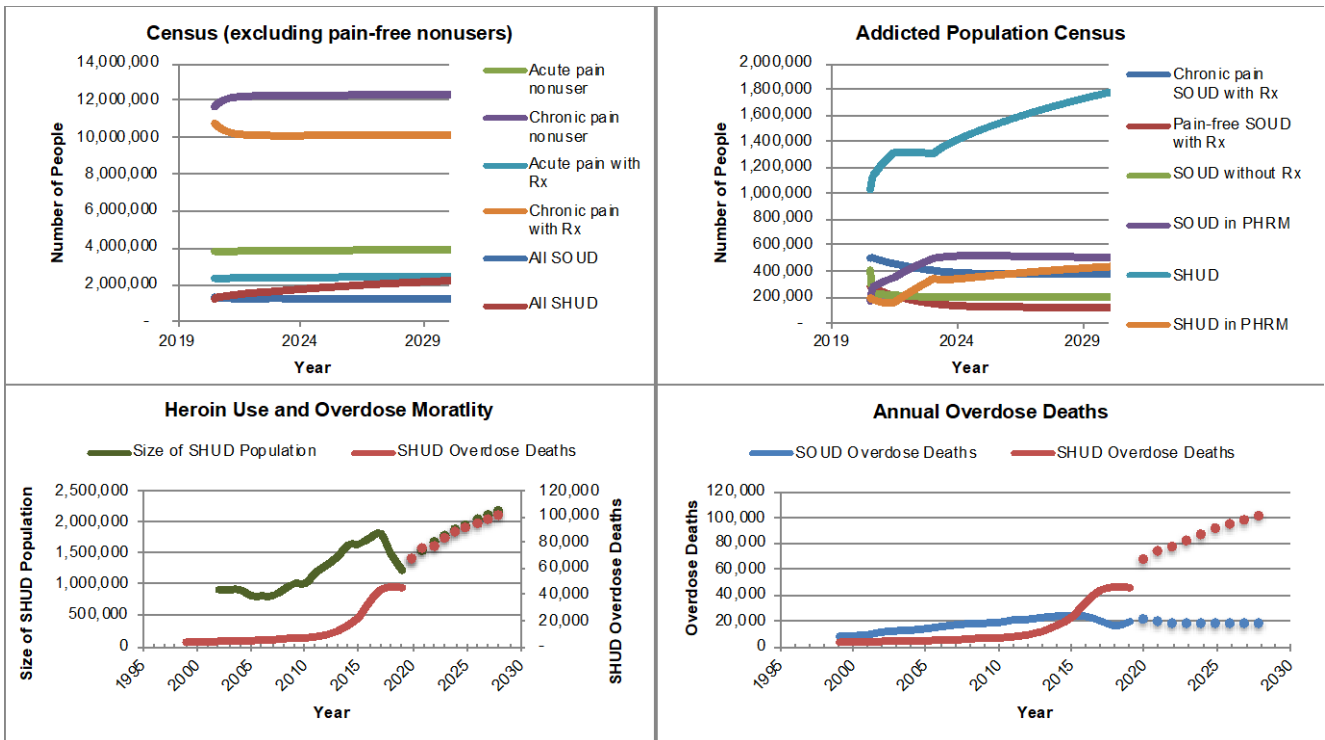

**Figure S1E. Projections for base case model 5 in the absence of additional intervention**

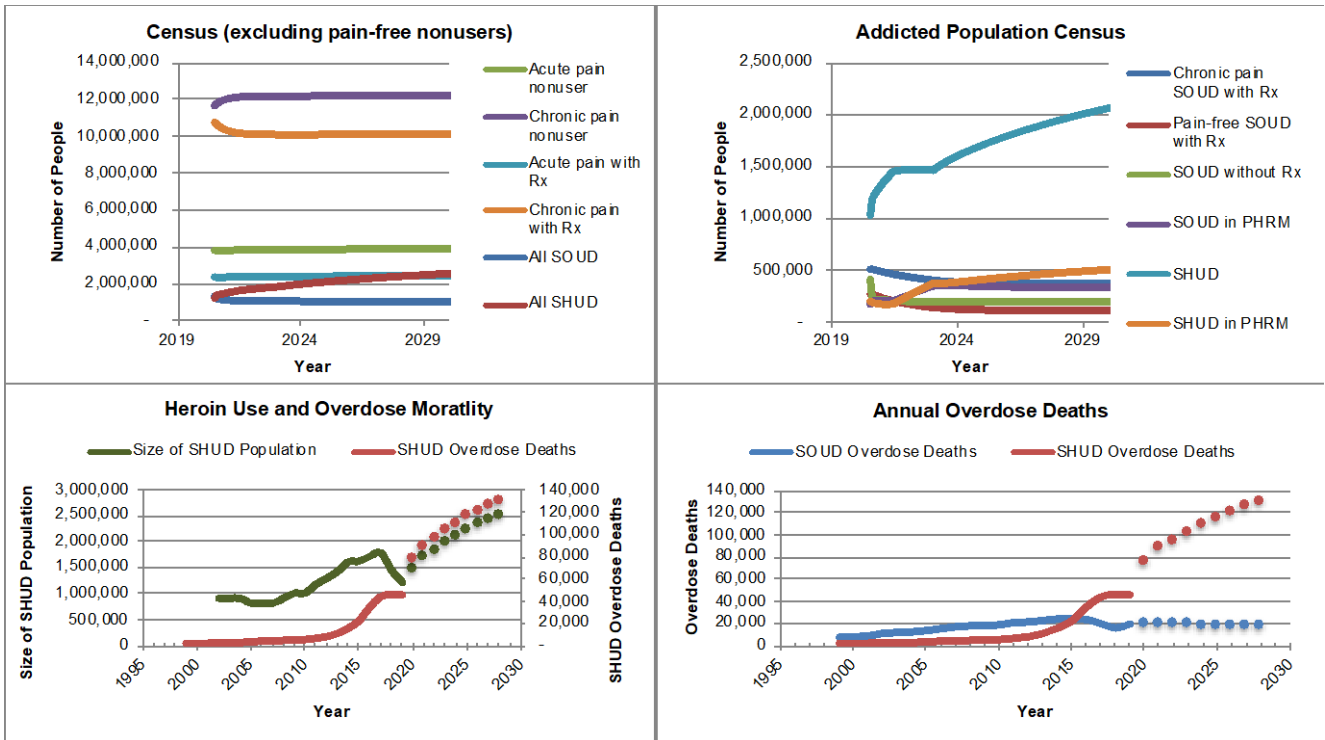

**Figure S1F. Projections for base case model 6 in the absence of additional intervention**

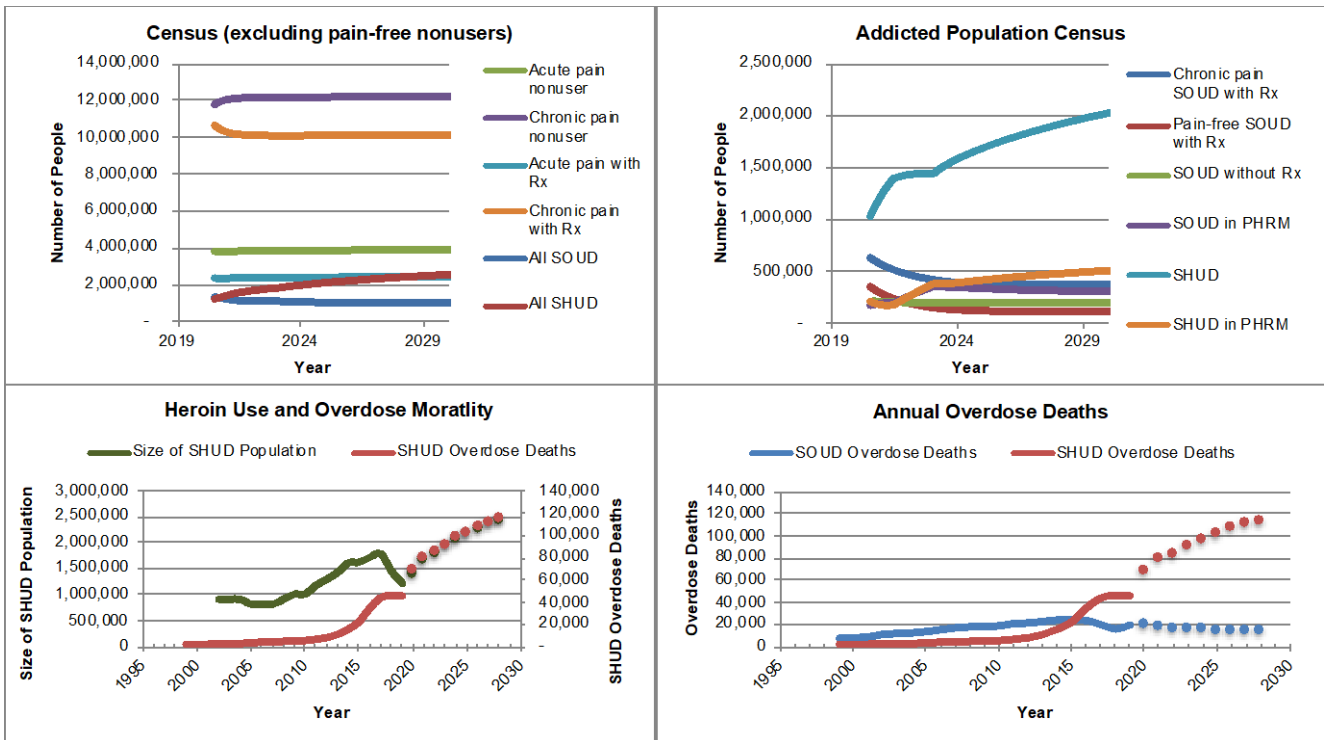

**Figure S1G. Projections for base case model 7 in the absence of additional intervention**

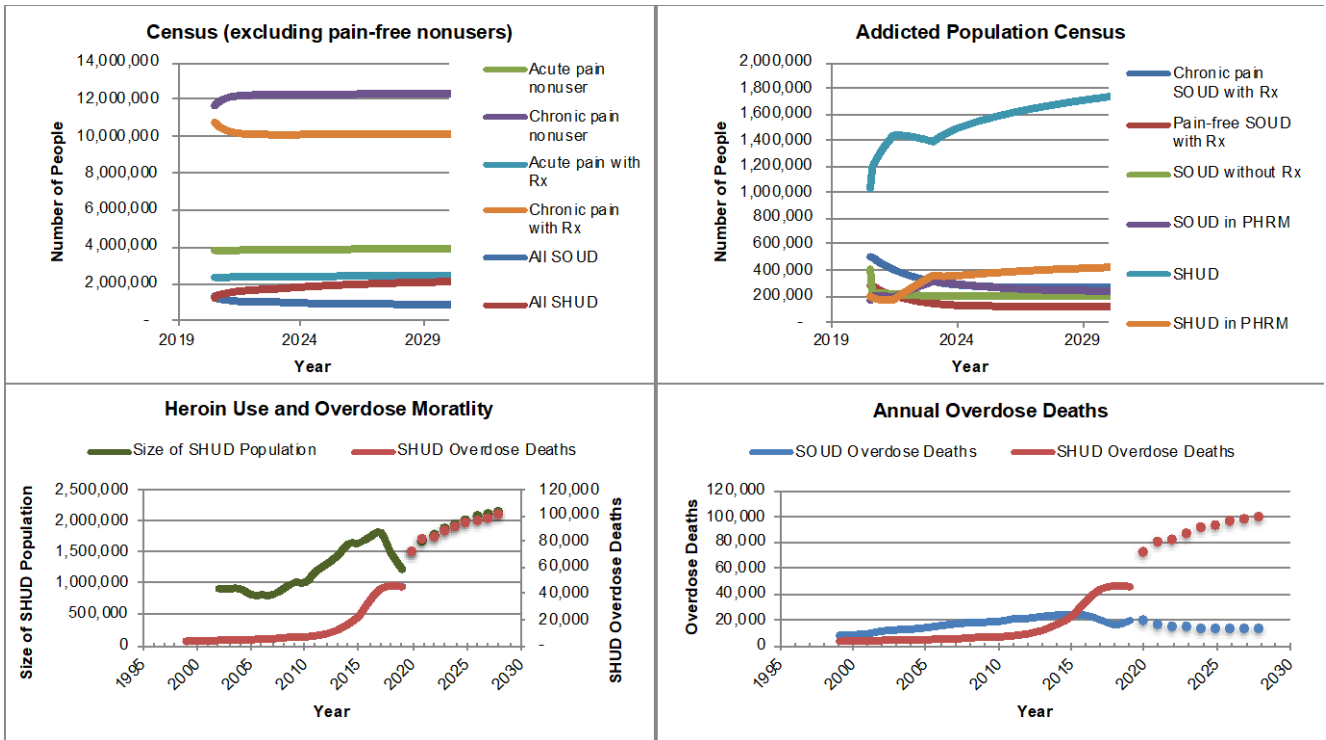

**Figure S1H. Projections for base case model 8 in the absence of additional intervention**

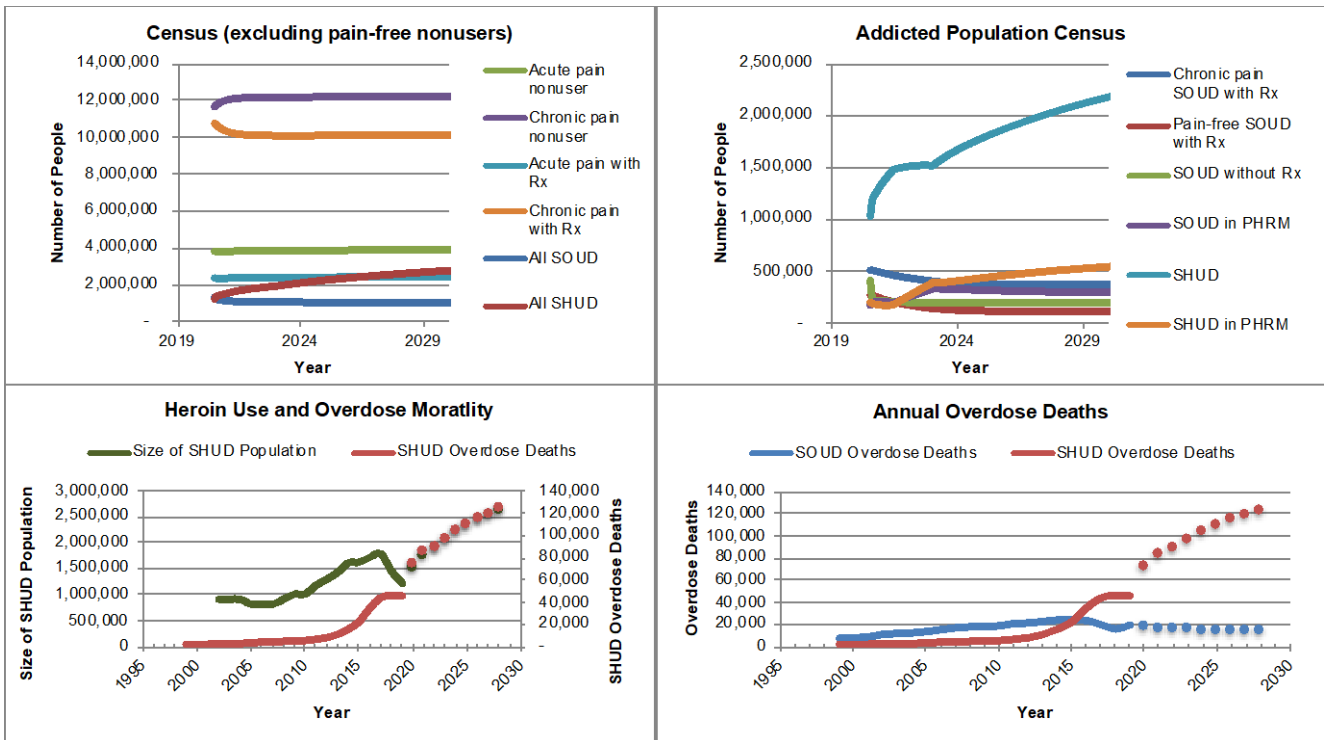

**Figure S1I. Projections for base case model 9 in the absence of additional intervention**

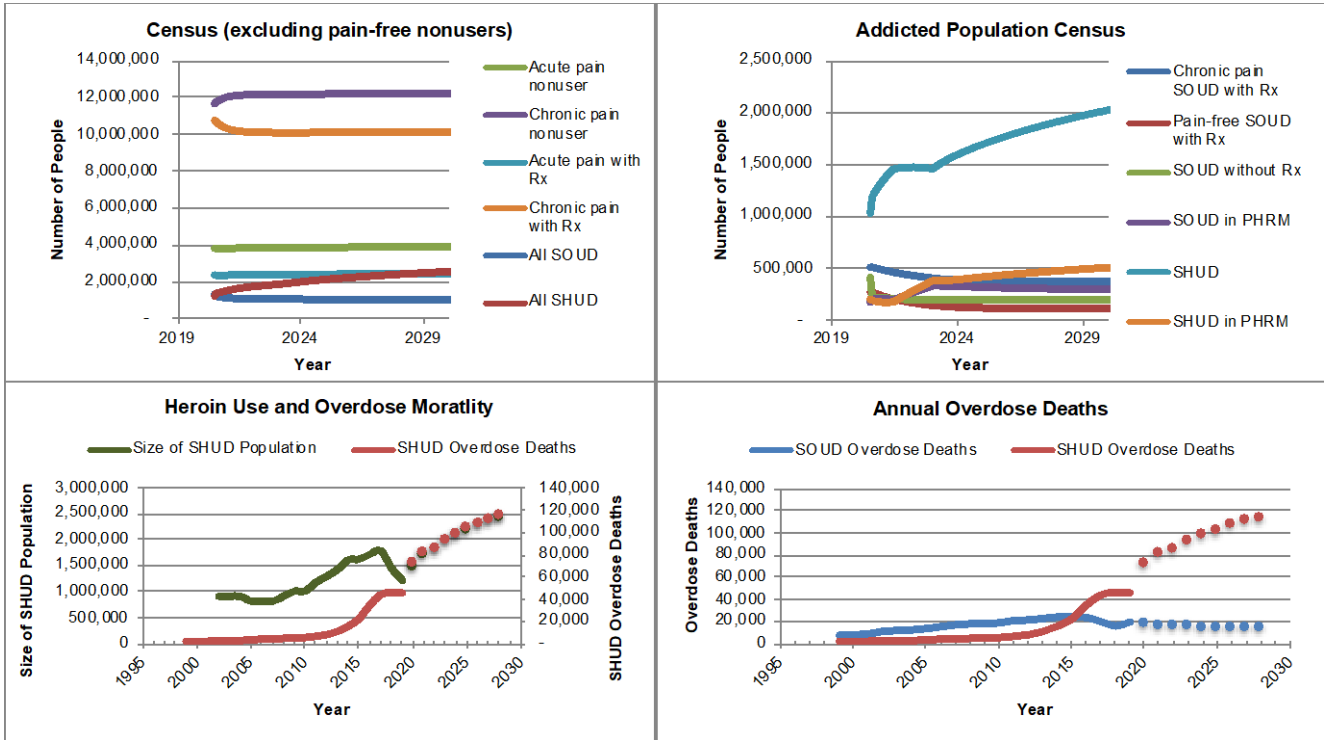

**Figure S1J. Projections for base case model 10 in the absence of additional intervention**

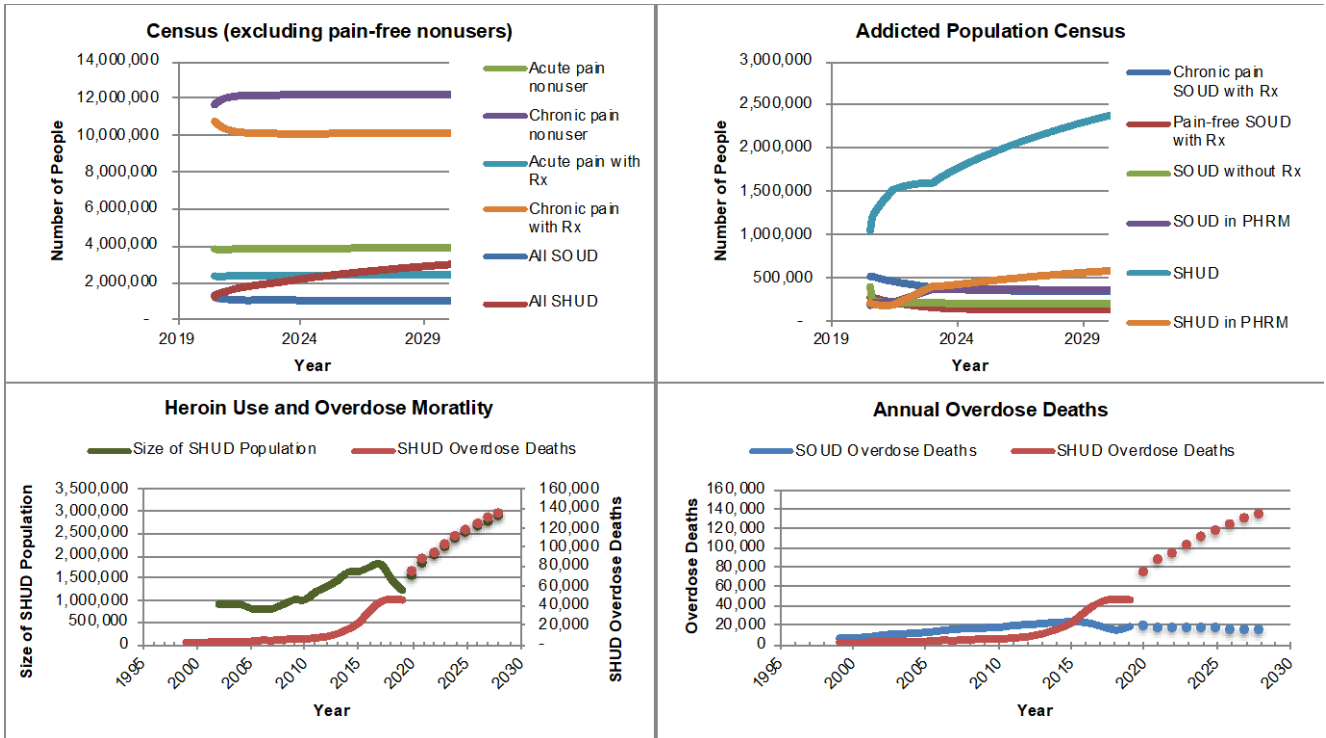

Abbreviations: SOUD = severe opioid use disorder; SHUD = severe heroin use disorder; PHRM = pharmacotherapy

**Table S1. Parameter values and sources**

| <b>Parameter</b>                                                                                     | <b>Value</b> | <b>Source</b>                        |
|------------------------------------------------------------------------------------------------------|--------------|--------------------------------------|
| <b>DEMOGRAPHIC DATA</b>                                                                              |              |                                      |
| Total population size, age 12+                                                                       | 276,077,200  | 1                                    |
| Chronic pain prevalence (moderate to severe)                                                         | 8.6%         | Calculated <sup>2-5</sup>            |
| Acute pain prevalence (moderate to severe)                                                           | 2.5%         | Calculated <sup>6-11</sup>           |
| Severe opioid use disorder prevalence                                                                | 0.49%        | Calculated <sup>12</sup>             |
| Severe heroin use disorder prevalence                                                                | 0.36%        | Calculated <sup>12-15</sup>          |
| Rate of maturation into the population, people/month                                                 | 234,167      | Assumed <sup>16,17</sup>             |
| <b>PAIN NATURAL HISTORY</b>                                                                          |              |                                      |
| Acute pain incidence for pain-free nonusers, %/month                                                 | 2.5%         | Calculated <sup>6,7,9,10,18,19</sup> |
| Chronic pain incidence for pain-free nonusers, %/month                                               | 0.30%        | Assumed                              |
| Chronic pain subsidence, %/month                                                                     | 8%           | Assumed <sup>20</sup>                |
| Probability that acute pain persists without opioid prescription                                     | 15.0%        | Assumed <sup>21</sup>                |
| Probability that acute pain persists with opioid prescription                                        | 14.7%        | Assumed                              |
| Percent of 12+ population with chronic pain of any severity                                          | 43%          | Calculated <sup>3-5</sup>            |
| Percent of chronic pain population with moderate to severe pain                                      | 20%          | Assumed <sup>2</sup>                 |
| Percent of 12+ population getting surgery or ED trauma visit                                         | 4%           | Calculated <sup>9,10,18,19</sup>     |
| Percent of surgeries resulting in moderate to severe pain                                            | 61%          | 6                                    |
| Percent of prescription-holding SOUD population who suffer from chronic pain                         | 65%          | 22                                   |
| Percent of SOUD without Rx and SHUD populations who have with chronic pain                           | 45%          | Assumed <sup>23</sup>                |
| Risk ratio for chronic pain developing during acute pain treatment with vs. without opioids          | 0.98         | Assumed                              |
| <b>PRESCRIBING BEHAVIOR</b>                                                                          |              |                                      |
| Percent of acute pain patients prescribed opioids                                                    | 38%          | Calculated <sup>24-28</sup>          |
| Probability of continued use of opioids for pain that persists from acute                            | 50%          | Assumed <sup>24</sup>                |
| Percent of total population prescribed opioids for chronic pain                                      | 4%           | Calculated <sup>29</sup>             |
| Probability of chronic pain sufferer being prescribed opioids, %/month                               | 7.6%         | Assumed                              |
| Probability of SOUD individual being prescribed opioids, %/month                                     | 7.6%         | Assumed                              |
| Probability of opioid prescription renewal for chronic pain patients without SOUD, %/month           | 97%          | Assumed                              |
| Probability of opioid prescription renewal for individuals with SOUD, %/month                        | 94%          | Assumed <sup>30</sup>                |
| Estimated annual decline in opioid prescriptions from 2018-2019                                      | 8.9%         | 31                                   |
| Probability of individuals with iatrogenic SOUD continuing use of opioids after acute pain treatment | 50%          | Assumed                              |

| <b>Parameter</b>                                                                                                                           | <b>Value</b> | <b>Source</b>               |
|--------------------------------------------------------------------------------------------------------------------------------------------|--------------|-----------------------------|
| Probability that chronic pain opioid user without Soud wants to get prescription renewed, %/month                                          | 99%          | Assumed                     |
| Probability that an opioid user is able to get renewal for chronic pain prescription if they choose, %/month                               | 98%          | Assumed                     |
| <b>USE DISORDER</b>                                                                                                                        |              |                             |
| Probability of developing SHUD for non-opioid users with no pain                                                                           | 0.002%       | Assumed                     |
| Probability of iatrogenic Soud with opioid prescription, %/month                                                                           | 0.20%        | Calculated <sup>32,33</sup> |
| Probability of a non-medical user developing Soud from diverted pills, %/month                                                             | 7%           | Calculated <sup>34</sup>    |
| Baseline* rate of escalation to SHUD from Soud without Rx, %/month                                                                         | 4%           | Assumed                     |
| Probability of escalation to SHUD if there are not diverted pills for Soud without Rx                                                      | 75%-60%      | Expert opinion              |
| Soud prevalence among population with opioid prescription for chronic pain                                                                 | 7%           | Assumed <sup>27,28,35</sup> |
| Percent of SHUD population who escalated from Soud                                                                                         | 80%          | 13,14                       |
| Number of pain-free nonusers a prescription holder diverts opioids to, #/month                                                             | 0.01         | Assumed                     |
| Proportionality factor relating Soud without Rx population able to be sustained by diverted pills to lagged number of prescription holders | 0.02         | Calculated                  |
| <b>TREATMENT AND DESISTANCE</b>                                                                                                            |              |                             |
| Percent of Soud population enrolled in pharmacotherapy                                                                                     | 13%-26%      | Assumed <sup>28</sup>       |
| Percent of SHUD population enrolled in pharmacotherapy                                                                                     | 16%-32%      | Assumed <sup>36,37</sup>    |
| Rate of Soud with Rx enrollment in pharmacotherapy, %/month                                                                                | 0.05%-1%     | Assumed                     |
| Rate of Soud without Rx enrollment in pharmacotherapy, %/month                                                                             | 2%-4%        | Assumed                     |
| Rate of SHUD enrollment in pharmacotherapy, %/month                                                                                        | 2%-4%        | Assumed <sup>38</sup>       |
| Rate of drop out from pharmacotherapy for Soud, %/month                                                                                    | 5%           | Assumed                     |
| Rate of drop out from pharmacotherapy for SHUD, %/month                                                                                    | 14%          | Calculated <sup>39</sup>    |
| Rate of desistance from Soud in pharmacotherapy, %/month                                                                                   | 1.0%         | Assumed <sup>23</sup>       |
| Baseline rate of desistance from Soud without pharmacotherapy, %/month                                                                     | 0.5%         | Calculated <sup>23,40</sup> |
| Rate of desistance from SHUD in pharmacotherapy, %/month                                                                                   | 0.5%         | Assumed                     |
| Rate of desistance from SHUD not in pharmacotherapy, %/month                                                                               | 0.25%        | Assumed                     |
| Probability of enrollment in pharmacotherapy if there are not diverted pills for Soud without Rx                                           | 15%-30%      | Expert opinion              |
| Probability of desistance if there are not diverted pills for Soud without Rx                                                              | 10%          | Expert opinion              |



| <b>Parameter</b>                                                                                                          | <b>Value</b> | <b>Source</b>                        |
|---------------------------------------------------------------------------------------------------------------------------|--------------|--------------------------------------|
| <b>MORTALITY</b>                                                                                                          |              |                                      |
| Mortality rate for the general population, %/month                                                                        | 0.07%        | 17                                   |
| Mortality rate for SOUD not in pharmacotherapy %/month                                                                    | 0.23%        | Calculated <sup>12,17,40-42</sup>    |
| Mortality rate for SHUD not in pharmacotherapy %/month                                                                    | 0.54%        | Calculated <sup>12,15,17,41-43</sup> |
| Mortality rate for SOUD in pharmacotherapy %/month                                                                        | 0.15%        | Calculated <sup>40</sup>             |
| Mortality rate for SHUD in pharmacotherapy %/month                                                                        | 0.30%        | Calculated <sup>40</sup>             |
| Overdose mortality for person with SHUD, not in pharmacotherapy, %/month                                                  | 0.43%        | Calculated <sup>12,15,17,41,42</sup> |
| Overdose mortality for person with SOUD, not in pharmacotherapy, %/month                                                  | 0.15%        | Calculated <sup>12,17,40-42</sup>    |
| Infection-related mortality for person with SHUD, not in pharmacotherapy, %/month                                         | 0.03%        | Calculated <sup>43</sup>             |
| 1-month relative risk of use disorder-related mortality in vs. out of pharmacotherapy for person with severe use disorder | 0.50         | 40                                   |
| <b>UTILITY VALUES</b>                                                                                                     |              |                                      |
| Pain-free nonuser                                                                                                         | 1            | Assumed                              |
| Chronic pain nonuser                                                                                                      | 0.85         | Assumed                              |
| Acute pain nonuser                                                                                                        | 0.88         | Calculated <sup>6,44</sup>           |
| Acute pain with Rx                                                                                                        | 0.94         | Calculated <sup>6,44</sup>           |
| Chronic pain with Rx                                                                                                      | 0.85         | Assumed                              |
| SOUD not in pharmacotherapy                                                                                               | 0.83         | Assumed                              |
| SOUD in pharmacotherapy                                                                                                   | 0.92         | Assumed                              |
| SHUD not in pharmacotherapy                                                                                               | 0.8          | 45-47                                |
| SHUD in pharmacotherapy                                                                                                   | 0.9          | 45-47                                |
| Dead                                                                                                                      | 0            | Assumed                              |

Abbreviations: Rx = prescription; SHUD = severe heroin use disorder; SOUD = severe opioid use disorder

**Table S2. Results of base-case analyses with no additional intervention**

**Table S2a. Results over 5 years**

| <b>Set</b> | <b>Parameter Set Brief Description</b>                                           | <b>Discounted Net Present LYs (Thousands)</b> | <b>Discounted Net Present QALYs (Thousands)</b> | <b>Total Opioid Use Disorder Deaths</b> | <b>Pill Deaths</b> | <b>Heroin Deaths</b> |
|------------|----------------------------------------------------------------------------------|-----------------------------------------------|-------------------------------------------------|-----------------------------------------|--------------------|----------------------|
| 1          | Reference case                                                                   | 6,323,398                                     | 6,224,610                                       | 551,410                                 | 86,165             | 465,245              |
| 2          | Decreased chance of heroin death                                                 | 6,327,809                                     | 6,228,243                                       | 444,130                                 | 86,166             | 357,964              |
| 3          | Increased chance of prescription opioid death                                    | 6,322,344                                     | 6,223,704                                       | 571,413                                 | 107,318            | 464,094              |
| 4          | Reduced probability of turning to heroin if there are not enough pills to divert | 6,325,973                                     | 6,227,398                                       | 510,306                                 | 93,437             | 416,869              |
| 5          | Reduced pharmacotherapy effectiveness                                            | 6,319,769                                     | 6,221,158                                       | 613,237                                 | 101,048            | 512,189              |
| 6          | Increased chance of individuals with SOUD having a prescription (initial)        | 6,323,584                                     | 6,224,797                                       | 544,933                                 | 90,067             | 454,866              |
| 7          | Decreased chance of iatrogenic use disorder                                      | 6,326,165                                     | 6,227,859                                       | 521,638                                 | 77,852             | 443,786              |
| 8          | Increased chance of starting heroin from no pain non-use disorder state          | 6,321,941                                     | 6,222,912                                       | 569,065                                 | 86,160             | 482,905              |
| 9          | Decreased chance of escalating from SOUD to SHUD regardless of pill supply       | 6,323,398                                     | 6,224,610                                       | 551,410                                 | 86,165             | 465,245              |
| 10         | Increased likelihood of diverting opioid prescription to pain-free nonuser       | 6,320,089                                     | 6,220,763                                       | 591,530                                 | 87,342             | 504,188              |
| Mean       |                                                                                  | 6,323,447                                     | 6,224,605                                       | 546,907                                 | 90,172             | 456,735              |

**Table S2b. Results over 10 years**

| <b>Set</b> | <b>Parameter Set Brief Description</b>                                           | <b>Discounted Net Present LYs (Thousands)</b> | <b>Discounted Net Present QALYs (Thousands)</b> | <b>Total Opioid Use Disorder Deaths</b> | <b>Pill Deaths</b> | <b>Heroin Deaths</b> |
|------------|----------------------------------------------------------------------------------|-----------------------------------------------|-------------------------------------------------|-----------------------------------------|--------------------|----------------------|
| 1          | Reference case                                                                   | 6,759,006                                     | 6,652,032                                       | 1,226,112                               | 164,261            | 1,061,851            |
| 2          | Decreased chance of heroin death                                                 | 6,765,194                                     | 6,657,196                                       | 996,437                                 | 164,267            | 832,170              |
| 3          | Increased chance of prescription opioid death                                    | 6,757,822                                     | 6,651,002                                       | 1,261,789                               | 204,434            | 1,057,355            |
| 4          | Reduced probability of turning to heroin if there are not enough pills to divert | 6,762,881                                     | 6,656,282                                       | 1,121,251                               | 180,671            | 940,580              |
| 5          | Reduced pharmacotherapy effectiveness                                            | 6,753,518                                     | 6,646,673                                       | 1,383,189                               | 196,359            | 1,186,830            |
| 6          | Increased chance of individuals with SOUD having a prescription (initial)        | 6,759,171                                     | 6,652,204                                       | 1,218,802                               | 168,333            | 1,050,470            |
| 7          | Decreased chance of iatrogenic use disorder                                      | 6,764,316                                     | 6,658,235                                       | 1,112,636                               | 144,093            | 968,542              |
| 8          | Increased chance of starting heroin from no pain non-use disorder state          | 6,756,342                                     | 6,648,949                                       | 1,287,111                               | 164,224            | 1,122,887            |
| 9          | Decreased chance of escalating from SOUD to SHUD regardless of pill supply       | 6,759,006                                     | 6,652,032                                       | 1,226,112                               | 164,261            | 1,061,851            |
| 10         | Increased likelihood of diverting opioid prescription to pain-free nonuser       | 6,752,959                                     | 6,645,049                                       | 1,363,568                               | 167,645            | 1,195,922            |
| Mean       |                                                                                  | 6,759,021                                     | 6,651,966                                       | 1,219,701                               | 171,855            | 1,047,846            |

Abbreviations: LY = life year; QALY = quality-adjusted life year; SHUD = severe heroin use disorder; SOUD = severe opioid use disorder.

**Table S3. Results of interventions: difference from the status quo (mean, minimum, and maximum)**

**Table S3a. Results of interventions over five years**

| Policy                             | Mean Change [Min, Max]                 |                                          |                               |                                 |                                  |
|------------------------------------|----------------------------------------|------------------------------------------|-------------------------------|---------------------------------|----------------------------------|
|                                    | Discounted Net Present LYs (Thousands) | Discounted Net Present QALYs (Thousands) | Pill Deaths                   | Heroin Deaths                   | Total Opioid-Related Deaths      |
| Acute Pain Prescribing             | 244<br>[171, 323]                      | -80<br>[-166, 14]                        | -1,110<br>[-1,346, -932]      | -1,267<br>[-2,189, -662]        | -2,376<br>[-3,298, -1,593]       |
| Prescribing for Transitioning Pain | 53<br>[36, 72]                         | 71<br>[51, 95]                           | -555<br>[-690, -421]          | 217<br>[25, 291]                | -339<br>[-537, -203]             |
| Chronic Pain Prescribing           | 255<br>[138, 360]                      | 360<br>[227, 487]                        | -3,496<br>[-4,293, -3,119]    | 2,327<br>[1,183, 3,212]         | -1,169<br>[-2,223, 93]           |
| Drug Rescheduling                  | 1,000<br>[345, 1,665]                  | 1,783<br>[989, 2,600]                    | -38,300<br>[-46,921, -32,958] | 49,197<br>[30,670, 58,905]      | 10,897<br>[-3,947, 18,714]       |
| Drug Reformulation                 | 192<br>[125, 262]                      | 250<br>[172, 333]                        | -1,628<br>[-1,992, -1,415]    | 57<br>[-752, 614]               | -1,570<br>[-2,378, -800]         |
| Pharmacotherapy                    | 625<br>[161, 749]                      | 732<br>[297, 860]                        | 373<br>[-1, 1,644]            | -10,576<br>[-12,477, -4,338]    | -10,203<br>[-12,228, -2,694]     |
| Excess Opioid Disposal 10%         | 211<br>[156, 490]                      | 313<br>[252, 641]                        | -3,078<br>[-3,758, -2,616]    | 1,977<br>[-1,246, 2,891]        | -1,102<br>[-4,377, -309]         |
| Excess Opioid Disposal 15%         | 317<br>[233, 734]                      | 469<br>[377, 961]                        | -4,618<br>[-5,637, -3,924]    | 2,967<br>[-1,865, 4,338]        | -1,650<br>[-6,563, -462]         |
| Naloxone 5%                        | 970<br>[881, 1,055]                    | 808<br>[734, 878]                        | -4,441<br>[-5,274, -3,840]    | -19,012<br>[-21,071, -15,278]   | -23,454<br>[-26,032, -19,527]    |
| Naloxone 15%                       | 3,026<br>[2,751, 3,292]                | 2,519<br>[2,289, 2,738]                  | -13,345<br>[-15,850, -11,535] | -57,658<br>[-63,972, -46,223]   | -71,003<br>[-78,884, -58,988]    |
| Naloxone 30%                       | 6,436<br>[5,858, 7,010]                | 5,352<br>[4,868, 5,823]                  | -26,753<br>[-31,787, -23,120] | -117,212<br>[-130,269, -93,630] | -143,965<br>[-160,180, -119,217] |
| Syringe Exchange                   | 107<br>[95, 119]                       | 88<br>[78, 98]                           | 0<br>[0,0]                    | -2,809<br>[-3,116, -2,259]      | -2,809<br>[-3,116, -2,259]       |
| PMP                                | 515<br>[342, 695]                      | 90<br>[-114, 304]                        | -3,633<br>[-4,440, -3,122]    | -667<br>[-2,661, 681]           | -4,300<br>[-6,293, -2,441]       |
| Psychosocial Treatment             | 342<br>[291, 380]                      | 391<br>[335, 427]                        | -370<br>[-433, -309]          | -3,583<br>[-4,033, -2,866]      | -3,953<br>[-4,446, -3,213]       |
| Drug Rescheduling + Naloxone 5%    | 1,907<br>[1,186, 2,639]                | 2,537<br>[1,689, 3,409]                  | -40,870<br>[-49,912, -35,186] | 28,106<br>[12,003, 37,506]      | -12,764<br>[-25,520, -4,835]     |
| Drug Rescheduling + Naloxone 15%   | 3,837<br>[2,978, 4,711]                | 4,140<br>[3,176, 5,129]                  | -46,016<br>[-55,902, -39,646] | -14,757<br>[-26,145, -5,986]    | -60,773<br>[-71,540, -51,118]    |
| Drug Rescheduling + Naloxone 30%   | 7,057<br>[5,973, 8,174]                | 6,809<br>[5,656, 7,997]                  | -53,755<br>[-64,911, -46,350] | -80,785<br>[-97,600, -63,775]   | -134,540<br>[-150,355, -115,965] |

| Policy                                                                                              | Mean Change [Min, Max]                 |                                          |                               |                                 |                                  |
|-----------------------------------------------------------------------------------------------------|----------------------------------------|------------------------------------------|-------------------------------|---------------------------------|----------------------------------|
|                                                                                                     | Discounted Net Present LYs (Thousands) | Discounted Net Present QALYs (Thousands) | Pill Deaths                   | Heroin Deaths                   | Total Opioid-Related Deaths      |
| Drug Rescheduling + SEP                                                                             | 1,113<br>[451, 1,789]                  | 1,877<br>[1,078, 2,702]                  | -38,300<br>[-46,921, -32,958] | 46,091<br>[27,926, 55,753]      | 7,790<br>[-6,691, 15,561]        |
| Drug Rescheduling + Pharmacotherapy                                                                 | 1,580<br>[963, 2,353]                  | 2,454<br>[1,687, 3,379]                  | -37,606<br>[-46,155, -32,346] | 38,285<br>[21,032, 53,180]      | 679<br>[-13,189, 15,400]         |
| Drug Rescheduling + Psychosocial Treatment                                                          | 1,300<br>[636, 1,984]                  | 2,124<br>[1,320, 2,962]                  | -38,393<br>[-47,022, -33,031] | 45,631<br>[27,751, 55,197]      | 7,239<br>[-7,009, 14,919]        |
| PMP + Naloxone 5%                                                                                   | 1,467<br>[1,210, 1,727]                | 883<br>[609, 1,163]                      | -7,895<br>[-9,496, -6,807]    | -19,653<br>[-23,570, -15,660]   | -27,548<br>[-31,331, -23,297]    |
| PMP + Naloxone 15%                                                                                  | 3,485<br>[3,053, 3,916]                | 2,562<br>[2,142, 2,982]                  | -16,439<br>[-19,634, -14,194] | -58,244<br>[-66,062, -46,574]   | -74,684<br>[-82,669, -62,374]    |
| PMP + Naloxone 30%                                                                                  | 6,834<br>[6,118, 7,556]                | 5,343<br>[4,685, 6,002]                  | -29,306<br>[-34,910, -25,314] | -117,714<br>[-131,518, -93,932] | -147,020<br>[-163,320, -122,023] |
| PMP + SEP                                                                                           | 621<br>[441, 813]                      | 177<br>[-32, 401]                        | -3,633<br>[-4,440, -3,122]    | -3,472<br>[-5,747, -2,045]      | -7,105<br>[-9,380, -5,166]       |
| PMP + Pharmacotherapy                                                                               | 1,125<br>[706, 1,424]                  | 804<br>[412, 1,141]                      | -3,275<br>[-4,136, -2,265]    | -11,072<br>[-14,921, -4,735]    | -14,347<br>[-18,313, -7,000]     |
| PMP + Psychosocial Treatment                                                                        | 851<br>[663, 1,053]                    | 473<br>[253, 714]                        | -3,989<br>[-4,854, -3,419]    | -4,214<br>[-6,475, -2,844]      | -8,203<br>[-10,442, -6,263]      |
| All Prescribing (Acute, Transitioning, Chronic)                                                     | 553<br>[348, 758]                      | 352<br>[114, 596]                        | -5,099<br>[-6,252, -4,418]    | 1,171<br>[-1,002, 2,667]        | -3,927<br>[-6,101, -1,751]       |
| All Prescribing + Naloxone 5%                                                                       | 1,502<br>[1,215, 1,786]                | 1,142<br>[835, 1,451]                    | -9,288<br>[-11,218, -8,040]   | -17,894<br>[-21,982, -14,198]   | -27,182<br>[-31,138, -23,218]    |
| All Prescribing + Naloxone 15%                                                                      | 3,515<br>[3,055, 3,968]                | 2,816<br>[2,365, 3,265]                  | -17,688<br>[-21,178, -15,299] | -56,646<br>[-64,619, -45,248]   | -74,334<br>[-82,054, -62,289]    |
| All Prescribing + Naloxone 30%                                                                      | 6,856<br>[6,115, 7,598]                | 5,591<br>[4,904, 6,276]                  | -30,337<br>[-36,186, -26,226] | -116,361<br>[-130,296, -92,814] | -146,698<br>[-162,772, -121,928] |
| All Prescribing + SEP                                                                               | 659<br>[448, 876]                      | 439<br>[196, 693]                        | -5,099<br>[-6,252, -4,418]    | -1,645<br>[-4,098, -71]         | -6,743<br>[-9,198, -4,489]       |
| All Prescribing + Pharmacotherapy                                                                   | 1,161<br>[733, 1,484]                  | 1,063<br>[661, 1,430]                    | -4,736<br>[-5,939, -3,769]    | -9,231<br>[-13,257, -2,536]     | -13,967<br>[-18,111, -6,305]     |
| All Prescribing + Psychosocial Treatment                                                            | 887<br>[668, 1,113]                    | 733<br>[479, 1,003]                      | -5,447<br>[-6,657, -4,709]    | -2,371<br>[-4,810, -853]        | -7,818<br>[-10,236, -5,563]      |
| All Prescribing + Drug Reformulation + Pharmacotherapy + SEP + Naloxone 5% + Psychosocial Treatment | 2,689<br>[2,357, 3,183]                | 2,519<br>[2,143, 3,057]                  | -10,666<br>[-13,005, -9,230]  | -33,887<br>[-40,973, -27,622]   | -44,554<br>[-51,593, -38,081]    |

Abbreviations: LY = life year; PMP = prescription monitoring program; SEP = syringe exchange program; QALY = quality-adjusted life year.

**Table S3b. Results of interventions over ten years**

| Policy                             | Mean Change [Min, Max]                 |                                          |                                 |                                  |                                  |
|------------------------------------|----------------------------------------|------------------------------------------|---------------------------------|----------------------------------|----------------------------------|
|                                    | Discounted Net Present LYs (Thousands) | Discounted Net Present QALYs (Thousands) | Pill Deaths                     | Heroin Deaths                    | Total Opioid-Related Deaths      |
| Acute Pain Prescribing             | 492<br>[356, 645]                      | 184<br>[24, 363]                         | -2,960<br>[-3,550, -2,473]      | -6,971<br>[-10,428, -4,545]      | -9,932<br>[-13,365, -7,018]      |
| Prescribing for Transitioning Pain | 120<br>[87, 161]                       | 152<br>[111, 200]                        | -1,456<br>[-1,787, -1,108]      | -651<br>[-1,511, -353]           | -2,106<br>[-2,971, -1,461]       |
| Chronic Pain Prescribing           | 615<br>[395, 838]                      | 791<br>[537, 1,052]                      | -8,910<br>[-10,824, -7,839]     | -1,183<br>[-5,979, 2,443]        | -10,093<br>[-14,812, -5,396]     |
| Drug Rescheduling                  | 3,220<br>[1,978, 4,626]                | 4,428<br>[2,933, 6,089]                  | -80,415<br>[-98,066, -66,948]   | 43,148<br>[13,352, 55,268]       | -37,267<br>[-66,479, -12,009]    |
| Drug Reformulation                 | 397<br>[276, 532]                      | 492<br>[351, 648]                        | -3,887<br>[-4,704, -3,334]      | -3,696<br>[-6,733, -1,599]       | -7,583<br>[-10,588, -4,933]      |
| Pharmacotherapy                    | 972<br>[240, 1,188]                    | 1,132<br>[424, 1,361]                    | 1,215<br>[286, 4,636]           | -29,228<br>[-35,110, -12,098]    | -28,013<br>[-34,256, -7,462]     |
| Excess Opioid Disposal 10%         | 477<br>[377, 998]                      | 630<br>[521, 1,236]                      | -7,374<br>[-8,919, -6,399]      | -681<br>[-12,242, 1,434]         | -8,055<br>[-19,738, -5,873]      |
| Excess Opioid Disposal 15%         | 716<br>[565, 1,496]                    | 945<br>[782, 1,853]                      | -11,061<br>[-13,379, -9,598]    | -1,010<br>[-18,346, 2,161]       | -12,072<br>[-29,589, -8,800]     |
| Naloxone 5%                        | 1,300<br>[1,140, 1,457]                | 1,096<br>[962, 1,226]                    | -8,434<br>[-10,009, -7,087]     | -39,881<br>[-45,739, -33,139]    | -48,315<br>[-53,982, -41,215]    |
| Naloxone 15%                       | 4,056<br>[3,559, 4,548]                | 3,414<br>[2,998, 3,825]                  | -25,351<br>[-30,094, -21,298]   | -121,950<br>[-139,797, -100,916] | -147,302<br>[-164,569, -125,187] |
| Naloxone 30%                       | 8,628<br>[7,575, 9,686]                | 7,253<br>[6,372, 8,133]                  | -50,851<br>[-60,385, -42,706]   | -251,057<br>[-287,593, -206,446] | -301,908<br>[-337,268, -255,116] |
| Syringe Exchange                   | 150<br>[133, 173]                      | 126<br>[111, 145]                        | 0<br>[0,0]                      | -5,934<br>[-6,791, -4,933]       | -5,934<br>[-6,791, -4,933]       |
| PMP                                | 1,096<br>[768, 1,454]                  | 736<br>[351, 1,153]                      | -9,468<br>[-11,441, -8,057]     | -11,378<br>[-19,320, -5,810]     | -20,846<br>[-28,717, -13,867]    |
| Psychosocial Treatment             | 661<br>[561, 744]                      | 758<br>[646, 837]                        | -819<br>[-1,020, -652]          | -13,626<br>[-15,567, -11,118]    | -14,446<br>[-16,533, -11,880]    |
| Drug Rescheduling + Naloxone 5%    | 4,396<br>[3,035, 5,922]                | 5,418<br>[3,824, 7,179]                  | -84,933<br>[-103,322, -70,770]  | 1,560<br>[-32,882, 16,148]       | -83,373<br>[-117,062, -54,621]   |
| Drug Rescheduling + Naloxone 15%   | 6,896<br>[5,281, 8,676]                | 7,519<br>[5,713, 9,493]                  | -93,988<br>[-113,853, -78,424]  | -83,996<br>[-127,956, -63,720]   | -177,984<br>[-220,847, -142,144] |
| Drug Rescheduling + Naloxone 30%   | 11,060<br>[9,028, 13,273]              | 11,011<br>[8,858, 13,345]                | -107,611<br>[-129,698, -89,933] | -218,526<br>[-277,349, -177,489] | -326,136<br>[-383,338, -279,408] |

| Policy                                                                                              | Mean Change [Min, Max]                 |                                          |                               |                                  |                                  |
|-----------------------------------------------------------------------------------------------------|----------------------------------------|------------------------------------------|-------------------------------|----------------------------------|----------------------------------|
|                                                                                                     | Discounted Net Present LYs (Thousands) | Discounted Net Present QALYs (Thousands) | Pill Deaths                   | Heroin Deaths                    | Total Opioid-Related Deaths      |
| Drug Rescheduling + SEP                                                                             | 3,371<br>[2,115, 4,794]                | 4,554<br>[3,048, 6,230]                  | -80,415<br>[-98,066, -66,948] | 37,011<br>[6,538, 49,218]        | -43,404<br>[-73,293, -17,730]    |
| Drug Rescheduling + Pharmacotherapy                                                                 | 4,076<br>[2,865, 5,658]                | 5,415<br>[3,934, 7,258]                  | -78,578<br>[-96,051, -65,346] | 15,383<br>[-19,553, 41,045]      | -63,194<br>[-97,768, -39,404]    |
| Drug Rescheduling + Psychosocial Treatment                                                          | 3,775<br>[2,499, 5,227]                | 5,061<br>[3,526, 6,773]                  | -80,598<br>[-98,262, -67,087] | 30,780<br>[-15, 43,030]          | -49,818<br>[-80,003, -24,057]    |
| PMP + Naloxone 5%                                                                                   | 2,362<br>[1,884, 2,867]                | 1,802<br>[1,292, 2,343]                  | -17,438<br>[-20,890, -14,748] | -50,813<br>[-64,293, -41,540]    | -68,251<br>[-81,470, -56,964]    |
| PMP + Naloxone 15%                                                                                  | 5,045<br>[4,250, 5,866]                | 4,060<br>[3,284, 4,863]                  | -33,423<br>[-39,851, -28,164] | -131,969<br>[-156,782, -108,599] | -165,391<br>[-189,563, -140,705] |
| PMP + Naloxone 30%                                                                                  | 9,499<br>[8,182, 10,852]               | 7,798<br>[6,587, 9,045]                  | -57,517<br>[-68,448, -48,375] | -259,646<br>[-302,133, -213,011] | -317,163<br>[-358,421, -268,152] |
| PMP + SEP                                                                                           | 1,244<br>[900, 1,624]                  | 859<br>[462, 1,295]                      | -9,468<br>[-11,441, -8,057]   | -17,242<br>[-25,994, -11,221]    | -26,710<br>[-35,390, -19,277]    |
| PMP + Pharmacotherapy                                                                               | 2,035<br>[1,454, 2,600]                | 1,829<br>[1,270, 2,465]                  | -8,311<br>[-10,406, -6,055]   | -39,788<br>[-53,388, -24,290]    | -48,099<br>[-61,968, -30,344]    |
| PMP + Psychosocial Treatment                                                                        | 1,738<br>[1,361, 2,154]                | 1,471<br>[1,030, 1,955]                  | -10,240<br>[-12,330, -8,671]  | -24,728<br>[-33,912, -18,551]    | -34,968<br>[-44,028, -27,222]    |
| All Prescribing (Acute, Transitioning, Chronic)                                                     | 1,230<br>[841, 1,647]                  | 1,129<br>[674, 1,615]                    | -13,157<br>[-15,953, -11,272] | -9,090<br>[-18,199, -2,734]      | -22,247<br>[-31,260, -14,005]    |
| All Prescribing + Naloxone 5%                                                                       | 2,491<br>[1,953, 3,053]                | 2,191<br>[1,612, 2,799]                  | -20,946<br>[-25,182, -17,805] | -48,620<br>[-63,218, -39,266]    | -69,566<br>[-83,881, -57,072]    |
| All Prescribing + Naloxone 15%                                                                      | 5,163<br>[4,312, 6,037]                | 4,439<br>[3,598, 5,307]                  | -36,569<br>[-43,701, -30,906] | -129,968<br>[-155,804, -106,845] | -166,537<br>[-191,709, -142,046] |
| All Prescribing + Naloxone 30%                                                                      | 9,599<br>[8,233, 10,999]               | 8,162<br>[6,891, 9,468]                  | -60,117<br>[-71,631, -50,640] | -257,943<br>[-301,301, -211,529] | -318,060<br>[-360,170, -269,226] |
| All Prescribing + SEP                                                                               | 1,378<br>[973, 1,816]                  | 1,252<br>[785, 1,757]                    | -13,157<br>[-15,953, -11,272] | -14,965<br>[-24,877, -8,161]     | -28,122<br>[-37,938, -19,432]    |
| All Prescribing + Pharmacotherapy                                                                   | 2,164<br>[1,591, 2,785]                | 2,216<br>[1,664, 2,918]                  | -11,990<br>[-14,898, -10,006] | -37,403<br>[-52,141, -21,414]    | -49,393<br>[-64,369, -31,420]    |
| All Prescribing + Psychosocial Treatment                                                            | 1,868<br>[1,430, 2,342]                | 1,859<br>[1,348, 2,411]                  | -13,906<br>[-16,815, -11,867] | -22,378<br>[-32,717, -15,421]    | -36,284<br>[-46,476, -27,288]    |
| All Prescribing + Drug Reformulation + Pharmacotherapy + SEP + Naloxone 5% + Psychosocial Treatment | 4,495<br>[3,813, 5,450]                | 4,508<br>[3,741, 5,545]                  | -23,830<br>[-28,962, -20,209] | -97,086<br>[-121,612, -80,974]   | -120,916<br>[-145,396, -104,291] |

Abbreviations: LY = life year; PMP = prescription monitoring program; SEP = syringe exchange program; QALY = quality-adjusted life year.

**Table S4. Results of sensitivity analyses: percentage reduction in opioid-related deaths, compared to no intervention**

**Table S4a. Results of sensitivity analysis over five years**

| Policy                         | Base Case | Heroin mortality |       | Pill mortality |       | Probability of escalation to heroin |       | QALYs for chronic pain with opioid prescription |       | Diversion of pills to non-users |       | Probability of starting pharmacotherapy for individual with SOUD and no prescription |       |
|--------------------------------|-----------|------------------|-------|----------------|-------|-------------------------------------|-------|-------------------------------------------------|-------|---------------------------------|-------|--------------------------------------------------------------------------------------|-------|
|                                |           | +25%             | -25%  | +25%           | -25%  | -25%                                | -50%  | +10%                                            | -2.0% | +50%                            | -50%  | -25%                                                                                 | -50%  |
| Acute Pain Prescribing         | -0.4      | -0.4             | -0.5  | -0.5           | -0.4  | -0.4                                | -0.4  | -0.4                                            | -0.4  | -0.5                            | -0.4  | -0.4                                                                                 | -0.4  |
| Transitioning Pain Prescribing | -0.1      | 0.0              | -0.1  | -0.1           | 0.0   | -0.1                                | -0.1  | -0.1                                            | -0.1  | -0.1                            | 0.0   | -0.1                                                                                 | -0.1  |
| Chronic Pain Prescribing       | -0.2      | -0.1             | -0.4  | -0.4           | -0.1  | -0.3                                | -0.4  | -0.2                                            | -0.2  | -0.3                            | -0.1  | -0.2                                                                                 | -0.2  |
| Drug Rescheduling              | 2.0       | 3.2              | 0.1   | 0.3            | 3.8   | 0.6                                 | -1.3  | 2.0                                             | 2.0   | 1.0                             | 3.1   | 2.0                                                                                  | 1.9   |
| PMP                            | -0.8      | -0.7             | -0.9  | -0.9           | -0.7  | -0.8                                | -0.9  | -0.8                                            | -0.8  | -1.0                            | -0.6  | -0.8                                                                                 | -0.8  |
| Drug Reformulation             | -0.3      | -0.2             | -0.4  | -0.3           | -0.2  | -0.3                                | -0.4  | -0.3                                            | -0.3  | -0.4                            | -0.2  | -0.3                                                                                 | -0.3  |
| Excess Opioid Disposal 10%     | -0.2      | -0.1             | -0.3  | -0.3           | -0.1  | -0.4                                | -0.6  | -0.2                                            | -0.2  | -0.6                            | 0.2   | -0.2                                                                                 | -0.3  |
| Excess Opioid Disposal 15%     | -0.3      | -0.2             | -0.5  | -0.5           | -0.1  | -0.6                                | -0.9  | -0.3                                            | -0.3  | -0.9                            | 0.3   | -0.4                                                                                 | -0.4  |
| Naloxone Availability 5%       | -4.3      | -4.2             | -4.3  | -4.3           | -4.3  | -4.3                                | -4.3  | -4.3                                            | -4.3  | -4.3                            | -4.3  | -4.3                                                                                 | -4.3  |
| Naloxone Availability 15%      | -13.0     | -12.8            | -13.0 | -13.0          | -12.9 | -13.0                               | -13.1 | -13.0                                           | -13.0 | -13.0                           | -13.0 | -13.0                                                                                | -12.9 |
| Naloxone Availability 30%      | -26.3     | -26.1            | -26.4 | -26.4          | -26.2 | -26.4                               | -26.5 | -26.3                                           | -26.3 | -26.3                           | -26.3 | -26.3                                                                                | -26.2 |
| Pharmacotherapy                | -1.9      | -1.9             | -1.8  | -1.8           | -2.0  | -1.8                                | -1.6  | -1.9                                            | -1.9  | -1.9                            | -1.9  | -1.5                                                                                 | -1.0  |
| Psychosocial Treatment         | -0.7      | -0.7             | -0.7  | -0.7           | -0.7  | -0.7                                | -0.7  | -0.7                                            | -0.7  | -0.7                            | -0.7  | -0.7                                                                                 | -0.8  |
| Syringe Exchange               | -0.5      | -0.4             | -0.7  | -0.5           | -0.5  | -0.5                                | -0.5  | -0.5                                            | -0.5  | -0.5                            | -0.5  | -0.5                                                                                 | -0.5  |

Abbreviations: PMP = prescription monitoring program; QALY = quality-adjusted life year; SOUD = severe opioid use disorder.



**Table S4b. Results of sensitivity analysis over ten years**

| Policy                         | Base Case | Heroin mortality |       | Pill mortality |       | Probability of escalation to heroin |       | QALYs for chronic pain with opioid prescription |       | Diversion of pills to non-users |       | Probability of starting pharmacotherapy for individual with SOUD and no prescription |       |
|--------------------------------|-----------|------------------|-------|----------------|-------|-------------------------------------|-------|-------------------------------------------------|-------|---------------------------------|-------|--------------------------------------------------------------------------------------|-------|
|                                |           | +25%             | -25%  | +25%           | -25%  | -25%                                | -50%  | +10%                                            | -2.0% | +50%                            | -50%  | -25%                                                                                 | -50%  |
| Acute Pain Prescribing         | -0.8      | -0.8             | -0.8  | -0.8           | -0.8  | -0.8                                | -0.8  | -0.8                                            | -0.8  | -0.9                            | -0.7  | -0.8                                                                                 | -0.8  |
| Transitioning Pain Prescribing | -0.2      | -0.2             | -0.2  | -0.2           | -0.2  | -0.2                                | -0.2  | -0.2                                            | -0.2  | -0.2                            | -0.1  | -0.2                                                                                 | -0.2  |
| Chronic Pain Prescribing       | -0.8      | -0.7             | -1.0  | -1.0           | -0.7  | -0.9                                | -1.0  | -0.8                                            | -0.8  | -1.0                            | -0.6  | -0.8                                                                                 | -0.9  |
| Drug Rescheduling              | -3.1      | -2.2             | -4.4  | -4.4           | -1.6  | -3.9                                | -5.2  | -3.1                                            | -3.1  | -4.4                            | -1.6  | -3.2                                                                                 | -3.3  |
| PMP                            | -1.7      | -1.6             | -1.8  | -1.8           | -1.6  | -1.7                                | -1.8  | -1.7                                            | -1.7  | -1.9                            | -1.4  | -1.7                                                                                 | -1.8  |
| Drug Reformulation             | -0.6      | -0.6             | -0.7  | -0.7           | -0.6  | -0.6                                | -0.7  | -0.6                                            | -0.6  | -0.7                            | -0.5  | -0.6                                                                                 | -0.6  |
| Excess Opioid Disposal 10%     | -0.7      | -0.6             | -0.8  | -0.8           | -0.5  | -0.8                                | -1.1  | -0.7                                            | -0.7  | -1.2                            | -0.1  | -0.7                                                                                 | -0.8  |
| Excess Opioid Disposal 15%     | -1.0      | -0.9             | -1.2  | -1.2           | -0.8  | -1.3                                | -1.6  | -1.0                                            | -1.0  | -1.8                            | -0.1  | -1.1                                                                                 | -1.1  |
| Naloxone Availability 5%       | -4.0      | -3.8             | -4.1  | -4.0           | -3.9  | -4.0                                | -4.0  | -4.0                                            | -4.0  | -4.0                            | -4.0  | -3.9                                                                                 | -3.9  |
| Naloxone Availability 15%      | -12.1     | -11.8            | -12.3 | -12.1          | -12.0 | -12.1                               | -12.2 | -12.1                                           | -12.1 | -12.1                           | -12.1 | -12.0                                                                                | -12.0 |
| Naloxone Availability 30%      | -24.8     | -24.3            | -25.1 | -24.8          | -24.7 | -24.8                               | -24.9 | -24.8                                           | -24.8 | -24.8                           | -24.7 | -24.7                                                                                | -24.6 |
| Pharmacotherapy                | -2.3      | -2.3             | -2.2  | -2.2           | -2.4  | -2.2                                | -2.0  | -2.3                                            | -2.3  | -2.3                            | -2.3  | -1.8                                                                                 | -1.3  |
| Psychosocial Treatment         | -1.2      | -1.2             | -1.2  | -1.2           | -1.2  | -1.1                                | -1.1  | -1.2                                            | -1.2  | -1.2                            | -1.2  | -1.2                                                                                 | -1.3  |
| Syringe Exchange               | -0.5      | -0.4             | -0.6  | -0.5           | -0.5  | -0.5                                | -0.5  | -0.5                                            | -0.5  | -0.5                            | -0.5  | -0.5                                                                                 | -0.5  |

Abbreviations: PMP = prescription monitoring program; QALY = quality-adjusted life year; SOUD = severe opioid use disorder.

## References

1. US Census Bureau. Age and sex composition in the United States, 2019. 2019. <https://www.census.gov/data/tables/2019/demo/age-and-sex/2019-age-sex-composition.html> (accessed Jun 22 2021).
2. Huguet A, Miró J. The severity of chronic pediatric pain: an epidemiological study. *J Pain* 2008; **9**(3): 226-36.
3. Institute of Medicine. Relieving Pain in America: A Blueprint for Transforming Prevention, Care, Education, and Research. Washington, DC: National Academies Press; 2011.
4. Tsang A, Von Korff M, Lee S, et al. Common chronic pain conditions in developed and developing countries: gender and age differences and comorbidity with depression-anxiety disorders. *J Pain* 2008; **9**(10): 883-91.
5. Vetter TR. The epidemiology of pediatric chronic pain. *Handbook of Pediatric Chronic Pain*. New York: Springer Publishers; 2011: 1-14.
6. Apfelbaum JL, Chen C, Mehta SS, Gan, Tong J. Postoperative pain experience: results from a national survey suggest postoperative pain continues to be undermanaged. *Anesth Analg* 2003; **97**(2): 534-40.
7. Beaudoin FL, Straube S, Lopez J, Mello MJ, Baird J. Prescription opioid misuse among ED patients discharged with opioids. *Am J Emerg Med* 2014; **32**(6): 580-5.
8. Boudreau D, Von Korff M, Rutter CM, et al. Trends in long-term opioid therapy for chronic non-cancer pain. *Pharmacoepidemiol Drug Saf* 2009; **18**(12): 1166-75.
9. Cullen KA, Hall MJ, Golosinskiy A. Ambulatory surgery in the United States, 2006. Hyattsville, MD: National Center for Health Statistics, 2009.
10. DeFrances CJ, Lucas CA, Buie VC, Golosinskiy A. 2006 National Hospital Discharge Survey. *National Health Statistics Reports* 2008; (5): 1-20.
11. Dowell D, Zhang K, Noonan RK, Hockenberry JM. Mandatory provider review and pain clinic laws reduce the amounts of opioids prescribed and overdose death rates. *Health Aff (Millwood)* 2016; **35**(10): 1876-83.
12. Substance Abuse and Mental Health Services Administration. Results from the 2019 National Survey on Drug Use and Health: detailed tables. 2019 2020. <https://www.samhsa.gov/data/report/2019-nsduh-detailed-tables> (accessed Jun 17 2021).
13. Cicero TJ, Ellis MS, Surratt HL, Kurtz SP. The changing face of heroin use in the United States: a retrospective analysis of the past 50 years. *JAMA Psychiatry* 2014; **71**(7): 821-6.
14. Muhuri PK, Gfroerer JC, Davies MC. Associations of nonmedical pain reliever use and initiation of heroin use in the United States. 2013. <http://www.samhsa.gov/data/sites/default/files/DR006/DR006/nonmedical-pain-reliever-use-2013.htm> (accessed Jun 17 2021).
15. RAND Corporation. What America's users spend on illegal drugs: 2000-2010. Washington, DC: Office of National Drug Control Policy, Office of Research and Data Analysis, 2014.
16. Kochanek KD, Murphy SI, Xu JQ, Tejada-Vera B. Deaths: Final data for 2017. *Natl Vital Stat Rep* 2019; **68**(9): 1-76.

17. Xu JQ, Murphy SL, Kochanek KD, Arias E. Mortality in the United States, 2018. Hyattsville, MD: National Center for Health Statistics, 2020.
18. National Center for Injury Prevention and Control. CDC Injury Fact Book. Atlanta, GA: Centers for Disease Control and Prevention, 2006.
19. Sullivan D, Lyons M, Montgomery R, Quinlan-Colwell A. Exploring opioid-sparing multimodal analgesia options in trauma: a nursing perspective. *J Trauma Nurse* 2016; **23**(6): 361-75.
20. Suarez-Almazor ME, Kendall C, Johnson JA, Skeith K, Vincent D. Use of health status measures in patients with low back pain in clinical settings. Comparison of specific, generic and preference-based instruments. *Rheumatology (Oxford)* 2000; **39**(7): 783-90.
21. Kehlet H, Jensen TS, Woolf CJ. Persistent postsurgical pain: risk factors and prevention. *Lancet* 2006; **367**(9522): 1618-25.
22. Hser Y-I, Mooney LJ, Saxon AJ, Miotto K, Bell DS, Huang D. Chronic pain among patients with opioid use disorder: results from electronic health records data. *J Subst Abuse Treat* 2017; **77**: 26-30.
23. Weiss RD, Potter JS, Griffin ML, et al. Long-term outcomes from the National Drug Abuse Treatment Clinical Trials Network Prescription Opioid Addiction Treatment Study. *Drug Alcohol Depend* 2015; **150**: 112-9.
24. Brummett CM, Waljee JF, Goesling J, et al. New persistent opioid use after minor and major surgical procedures in US adults. *JAMA Surg* 2017; **152**(6): e170504.
25. Calcaterra SL, Yamashita TE, Min S-J, Keniston A, Frank JW, Binswanger IA. Opioid prescribing at hospital discharge contributes to chronic opioid use. *J Gen Intern Med* 2015; **31**(5): 478-85.
26. Mudumbai SC, Oliva EM, Lewis ET, et al. Time-to-cessation of postoperative opioids: a population-level analysis of the Veterans Affairs Health Care System. *Pain Med* 2016; **17**(9): 1732-43.
27. Centers for Disease Control and Prevention. Annual surveillance report of drug-related risks and outcomes -- United States, 2017. 2017. <https://www.cdc.gov/drugoverdose/pdf/pubs/2017-cdc-drug-surveillance-report.pdf> (accessed Jun 22 2021).
28. Centers for Disease Control and Prevention. Annual surveillance report of drug-related risks and outcomes -- United States surveillance special report. 2019. <https://www.cdc.gov/drugoverdose/pdf/pubs/2019-cdc-drug-surveillance-report.pdf> (accessed Jun 22 2021).
29. Mojtabai R. National trends in long-term use of prescription opioids. *Pharmacoepidemiol Drug Saf* 2017; **27**(5): 526-34.
30. Vanderlip ER, Sullivan MD, Edlund MJ, et al. National study of discontinuation of long-term opioid therapy among veterans. *Pain* 2014; **155**(12): 2673-9.
31. Centers for Disease Control and Prevention. U.S. opioid dispensing rate maps. 2020. <https://www.cdc.gov/drugoverdose/maps/rxrate-maps.html> (accessed Jun 22 2021).
32. Adams EH, Breiner S, Cicero TJ, et al. A comparison of the abuse liability of tramadol, NSAIDs, and hydrocodone in patients with chronic pain. *J Pain Symptom Manage* 2006; **31**(5): 465-76.

33. Fishbain DA, Cole B, Lewis J, Rosomoff HL, Rosomoff RS. What percentage of chronic nonmalignant pain patients exposed to chronic opioid analgesic therapy develop abuse/addiction and/or aberrant drug-related behaviors? A structured evidence-based review. *Pain Med* 2008; **9**(4): 444-59.
34. Boscarino JA, Rukstalis MR, Hoffman SN, et al. Prevalence of prescription opioid-use disorder among chronic pain patients: comparison of the DSM-5 vs. DSM-4 diagnostic criteria. *J Addict Dis* 2011; **30**(3): 185-94.
35. Vowles KE, McEntee ML, Julnes PS, Frohe T, Ney JP, van der Goes DN. Rates of opioid misuse, abuse, and addiction in chronic pain: a systematic review and data synthesis. *Pain* 2015; **156**(4): 569-76.
36. Substance Abuse and Mental Health Services Administration. 2018 National Survey on Drug Use and Health: detailed tables. 2019 2019. <https://www.samhsa.gov/data/report/2018-nsduh-detailed-tables> (accessed Jun 17 2021).
37. Substance Abuse and Mental Health Services Administration. Treatment Episode Data Set (TEDS): 2017. Admissions to and discharges from publicly-funded substance use treatment. 2019. <https://www.samhsa.gov/data/report/treatment-episode-data-set-teds-2017-admissions-and-discharges-publicly-funded-substance-use> (accessed Jun 17 2021).
38. Corsi KF, Lehman WK, Booth RE. The effect of methadone maintenance on positive outcomes for opiate injection drug users. *J Subst Abuse Treat* 2009; **37**(2): 120-6.
39. Connock M, Juarez-Garcia A, Jowett S, et al. Methadone and buprenorphine for the management of opioid dependence: a systematic review and economic evaluation. *Health Technol Assess* 2007; **11**(9): 1-171, iii-iv.
40. Schuckit MA. Treatment of opioid-use disorders. *N Engl J Med* 2016; **375**(4): 357-68.
41. Ahmad FB, Rossen LM, Sutton P. Provisional drug overdose death counts. 2020. <https://www.cdc.gov/nchs/nvss/vsrr/drug-overdose-data.htm> (accessed Aug 5 2020).
42. Ruhm CJ. Geographic variation in opioid and heroin involved drug poisoning mortality rates. *Am J Prev Med* 2017; **53**(6): 745-53.
43. Evans JL, Tsui JI, Hahn JA, Davidson PJ, Lum PJ, Page K. Mortality among young injection drug users in San Francisco: a 10-year follow-up of the UFO Study. *Am J Epidemiol* 2012; **175**(4): 302-8.
44. Dixon S, Poole CD, Odeyemi I, Retsa P, Chambers C, Currie CJ. Deriving health state utilities for the numerical pain rating scale. *Health Qual Life Outcomes* 2011; **9**: 96.
45. Barnett PG, Zaric GS, Brandeau ML. The cost effectiveness of buprenorphine maintenance therapy for opiate addiction in the United States. *Addiction* 2001; **96**: 1267-78.
46. Coffin PO, Sullivan SD. Cost-effectiveness of distributing naloxone to heroin users for lay overdose reversal. *Ann Intern Med* 2013; **158**(1): 1-9.
47. Zaric GS, Barnett PG, Brandeau ML. HIV transmission and the cost-effectiveness of methadone maintenance. *Am J Public Health* 2000; **90**(7): 1100-11.
